# Supplementary material
Source: PubMed Central journal article supplement (PMC3174545)

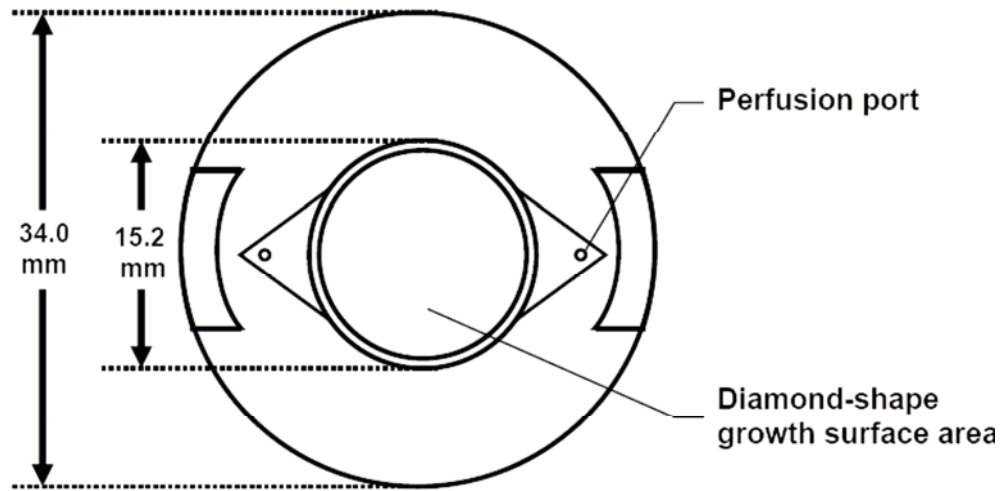

Figure S1

Supplement: supp_00075.2011_figS1.pdf [file supp_00075.2011_figS1.pdf]

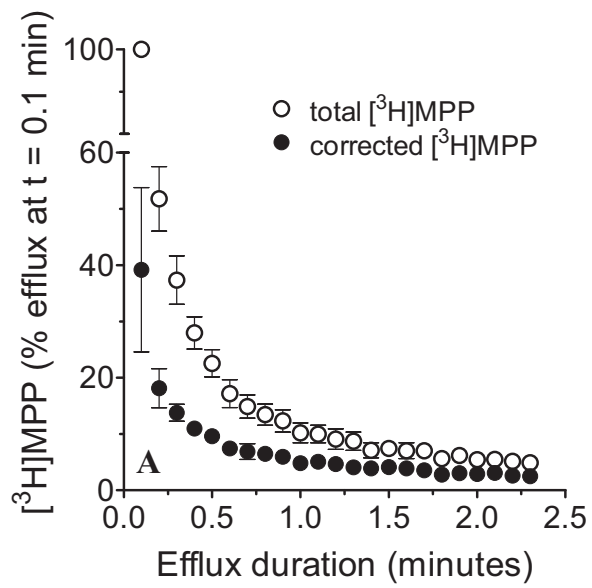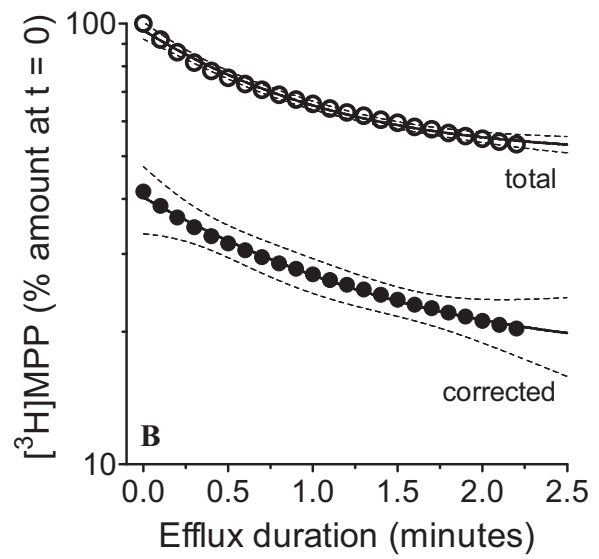

Figure S2

Supplement: supp_00075.2011_figS2.pdf [file supp_00075.2011_figS2.pdf]

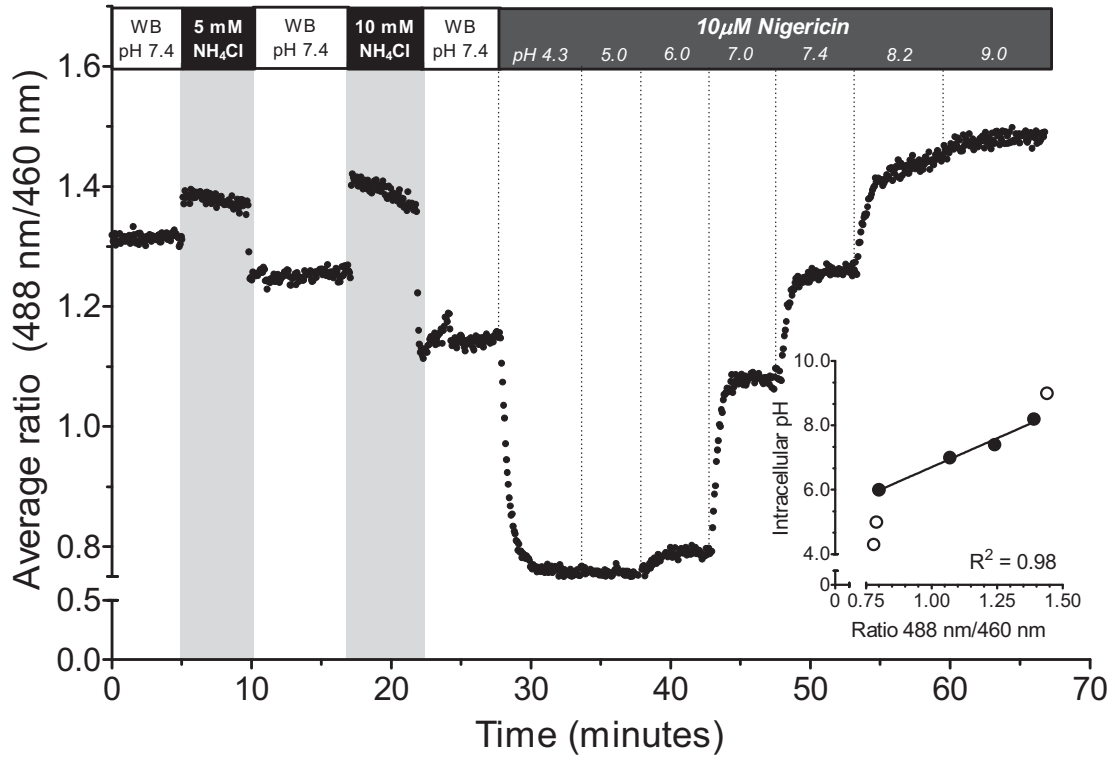

Figure S3

Supplement: supp_00075.2011_figS3.pdf [file supp_00075.2011_figS3.pdf]
